# Supplementary material for: Artificial intelligence-enhanced electrocardiography derived body mass index as a predictor of future cardiometabolic disease
Source: PubMed Central journal article supplement (PMC11199586; doi:10.1038/s41746-024-01170-0), 2024-06-25

**Artificial Intelligence-enhanced Electrocardiography Derived Body  
Mass Index as a Predictor of Future Cardiometabolic Disease**

**Supplement**

## Table of Contents

|                                                                                                                             |                  |
|-----------------------------------------------------------------------------------------------------------------------------|------------------|
| <b><i>Supplementary Table 1: Cohort demographics .....</i></b>                                                              | <b><i>3</i></b>  |
| <b><i>Supplementary Table 2: Model performance .....</i></b>                                                                | <b><i>4</i></b>  |
| <b><i>Supplementary Table 3: Outcome definition .....</i></b>                                                               | <b><i>5</i></b>  |
| <b><i>Supplementary Figure 1: Model predictions and bias correction .....</i></b>                                           | <b><i>5</i></b>  |
| <b><i>Supplementary Table 4: Survival analysis – continuous outcomes.....</i></b>                                           | <b><i>8</i></b>  |
| <b><i>Supplementary Table 5: Model improvement .....</i></b>                                                                | <b><i>10</i></b> |
| <b><i>Supplementary Figure 2 – Metabolome: calibration plot of stability selection with LASSO</i></b>                       | <b><i>12</i></b> |
| <b><i>Supplementary Figure 3: Pre-processing steps for the UK Biobank Proteomic and ECG dataset (UKB-PPP-ECG) .....</i></b> | <b><i>13</i></b> |
| <b><i>Supplementary Figure 4: Proteome: calibration plot of stability selection with LASSO .....</i></b>                    | <b><i>14</i></b> |
| <b><i>Supplementary Figure 5: GWAS QQ plots .....</i></b>                                                                   | <b><i>15</i></b> |
| <b><i>Supplementary Figure 6: The VAE Convolutional Architecture .....</i></b>                                              | <b><i>16</i></b> |
| <b><i>Supplementary Figure 7: AI-ECG BMI model explainability .....</i></b>                                                 | <b><i>17</i></b> |

## Supplementary Table 1: Cohort demographics

Summary of Patient Characteristics in the BIDMC and UK Biobank Cohorts. The table presents key demographic and clinical attributes, including age, gender distribution, BMI, blood pressure measurements, days to censor, prevalence of cardiometabolic disease, T2DM, hypertension, and lipid disorders, and ethnic distribution.

|                                       |                                   | <b>BIDMC</b>     | <b>UK Biobank</b> |
|---------------------------------------|-----------------------------------|------------------|-------------------|
| <b>Total, n</b>                       |                                   | 512950           | 42386             |
| <b>Age, median [Q1,Q3]</b>            |                                   | 66.5 [55.4,76.4] | 65.0 [58.0,70.0]  |
| <b>Female, n (%)</b>                  |                                   | 255787 (49.9)    | 21848 (51.5)      |
| <b>BMI, median [Q1,Q3]</b>            |                                   | 27.9 [24.3,32.5] | 25.9 [23.5,28.9]  |
| <b>Systolic BP, mean (SD)</b>         |                                   | 129.2 (14.1)     | 141.1 (19.9)      |
| <b>Diastolic BP, mean (SD)</b>        |                                   | 72.9 (9.4)       | 78.9 (10.6)       |
| <b>Days to censor, median [Q1,Q3]</b> |                                   | 1380 [505,2344]  | 1674 [1355,2219]  |
| <b>Cardiometabolic Disease, n (%)</b> |                                   | 64455 (12.6)     | 2759 (6.5)        |
| <b>T2DM, n (%)</b>                    |                                   | 49884 (9.7)      | 528 (1.2)         |
| <b>Hypertension n (%)</b>             |                                   | 61632 (12.0)     | 6798 (16.0)       |
| <b>Lipid Disorders, n (%)</b>         |                                   | 71887 (14.0)     | 2183 (5.2)        |
| <b>Ethnicity, n (%)</b>               | Caucasian                         | 347935 (67.8)    | 40926 (96.6)      |
|                                       | Asian                             | 18697 (3.6)      | 603 (1.4)         |
|                                       | African American/Black or British | 81369 (15.9)     | 305 (0.7)         |
|                                       | Hispanic                          | 31890 (6.2)      | N/A               |
|                                       | Other                             | 18246 (3.6)      | 436 (1.0)         |
|                                       | Unknown/Declined                  | 14813 (2.9)      | 103 (0.2)         |

## Supplementary Table 2: Model performance

Performance Metrics of the Predictive Model for Body Mass Index (BMI) Estimation. The table displays the Mean Absolute Error (MAE) of raw and bias-corrected predictions, Pearson correlation coefficient (Pearson  $r$ ), and coefficient of determination ( $R^2$ ) for BMI predictions across subgroups in the BIDMC and UK Biobank cohorts. These metrics are accompanied by 95% confidence intervals. Results are presented for the overall cohort as well as stratified by gender and ethnicity, providing insights into the model's accuracy and performance within diverse population segments.

|                   |                               | n (%)          | Raw<br>MAE (95% CI) | Bias-corrected<br>MAE (95% CI) | Pearson $r$ (95% CI) | $R^2$ (95% CI)   |
|-------------------|-------------------------------|----------------|---------------------|--------------------------------|----------------------|------------------|
| <b>BIDMC</b>      | <b>All</b>                    | 152166 (100)   | 3.95 (3.93-3.97)    | 6.14 (6.11-6.17)               | 0.65 (0.65-0.66)     | 0.43 (0.42-0.43) |
|                   | <b>Female</b>                 | 75,523 (49.6)  | 4.21 (4.18-4.24)    | 6.54 (6.49-6.58)               | 0.68 (0.67-0.68)     | 0.46 (0.45-0.47) |
|                   | <b>Male</b>                   | 76,643 (50.4)  | 3.69 (3.67-3.72)    | 5.75 (5.70-5.79)               | 0.62 (0.61-0.63)     | 0.39 (0.38-0.39) |
|                   | <b>Caucasian</b>              | 102,429 (67.3) | 3.88 (3.85-3.90)    | 6.03 (5.99-6.07)               | 0.65 (0.64-0.65)     | 0.42 (0.41-0.42) |
|                   | <b>African-American</b>       | 24,572 (16.2)  | 4.33 (4.27-4.39)    | 6.75 (6.67-6.83)               | 0.68 (0.66-0.69)     | 0.46 (0.44-0.47) |
|                   | <b>Asian</b>                  | 5,758 (3.8)    | 3.57 (3.50-3.65)    | 5.49 (5.37-5.62)               | 0.58 (0.56-0.60)     | 0.34 (0.31-0.36) |
|                   | <b>Hispanic</b>               | 9,608 (6.3)    | 4.01 (3.94-4.08)    | 6.23 (6.11-6.33)               | 0.61 (0.60-0.63)     | 0.37 (0.36-0.39) |
| <b>UK Biobank</b> | <b>All</b>                    | 38,148 (100)   | 2.94 (2.91-2.96)    | 4.38 (4.34-4.42)               | 0.62 (0.62-0.63)     | 0.39 (0.38-0.40) |
|                   | <b>Female</b>                 | 19,691 (51.6)  | 3.05 (3.01-3.09)    | 4.70 (4.64-4.76)               | 0.64 (0.63-0.65)     | 0.40 (0.39-0.42) |
|                   | <b>Male</b>                   | 18,455 (48.4)  | 2.82 (2.78-2.85)    | 4.04 (3.98-4.10)               | 0.59 (0.58-0.61)     | 0.35 (0.34-0.37) |
|                   | <b>Caucasian</b>              | 36,827 (96.5)  | 2.93 (2.90-2.95)    | 4.37 (4.33-4.41)               | 0.62 (0.62-0.63)     | 0.39 (0.38-0.40) |
|                   | <b>Black or Black British</b> | 278 (0.7)      | 3.10 (2.81-3.42)    | 5.00 (4.45-5.58)               | 0.59 (0.47-0.69)     | 0.35 (0.22-0.48) |
|                   | <b>Asian or Asian British</b> | 435 (1.1)      | 3.36 (3.11-3.61)    | 4.53 (4.11-4.94)               | 0.57 (0.48-0.65)     | 0.33 (0.23-0.42) |
|                   | <b>Mixed</b>                  | 183 (0.5)      | 3.11 (2.70-3.50)    | 4.32 (3.66-5.03)               | 0.68 (0.55-0.78)     | 0.47 (0.30-0.61) |

### Supplementary Table 3: Outcome definition

Primary and Secondary Outcome Definitions with Corresponding ICD-9 and ICD-10 Codes for Cardiometabolic Disease, Type 2 Diabetes Mellitus, Hypertension, and Lipid Disorders in the Study Cohort.

| Outcome                         | ICD9                                                                                                                                                       | ICD10                            |
|---------------------------------|------------------------------------------------------------------------------------------------------------------------------------------------------------|----------------------------------|
| <b>Cardiometabolic disease</b>  | 250.00, 250.02, 250.9, 250.92, 250.1, 250.12, 250.2, 250.22, 250.3, 250.32, 250.40, 250.50, 250.52, 250.60, 250.70, 250.72, 250.80, 250.82, 250.90, 250.92 | E11, E13, E14, G59<br>I10<br>E78 |
| <b>Type 2 diabetes mellitus</b> | 250.00, 250.02, 250.9, 250.92, 250.1, 250.12, 250.2, 250.22, 250.3, 250.32, 250.40, 250.50, 250.52, 250.60, 250.70, 250.72, 250.80, 250.82, 250.90, 250.92 | E11, E13, E14, G59               |
| <b>Hypertension</b>             | 401, 402, 403, 404, 405                                                                                                                                    | I10                              |
| <b>Lipid Disorders</b>          | 272                                                                                                                                                        | E78                              |

### Supplementary Figure 1: Model predictions and bias correction

A-B) Scatter plots depicting the association between bias-corrected AI-ECG-BMI and BMI within the 30% holdout BIDMC and UK Biobank cohorts. The solid black identity line serves as a reference point, representing the ideal prediction scenario. The red line represents the best fit line. C-D) Scatter plots demonstrating the relationship between bias-corrected AI-ECG delta BMI and BMI in the 30% holdout BIDMC and UK Biobank cohorts. A horizontal black line is included in these panels to serve as a reference, indicating the absence of a relationship between delta BMI and BMI. E-F) Bland-Altman plots for the BIDMC (30% holdout) and UK Biobank cohorts illustrate the comparison between bias-corrected AI-ECG-BMI predictions and measured BMI. The red line denotes the mean difference, while the two horizontal dashed black lines signify the upper and lower 95% confidence intervals. In both cohorts, the Bland-Altman analysis reveals that the mean difference falls within a narrow range

around zero, indicating a balanced agreement between bias-corrected AI-ECG-BMI predictions and measured BMI. This consistency suggests the absence of systemic bias.

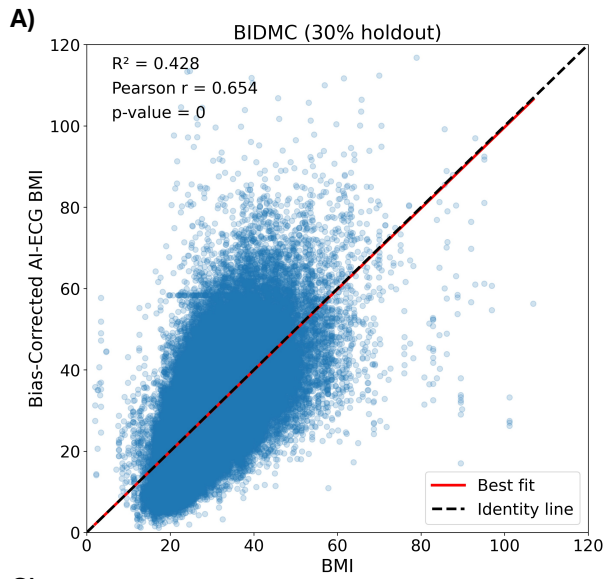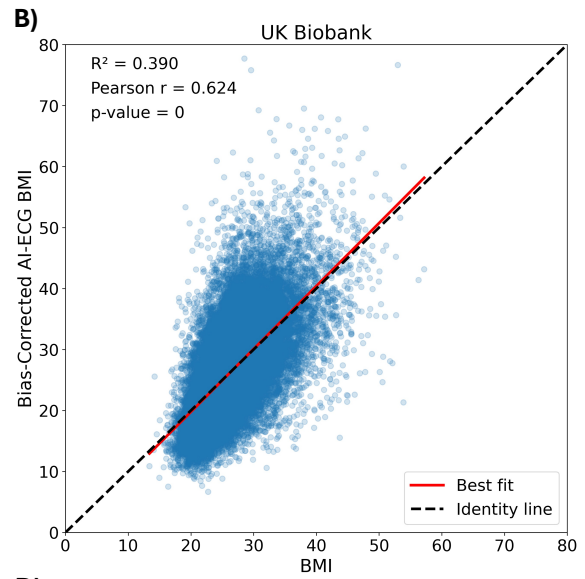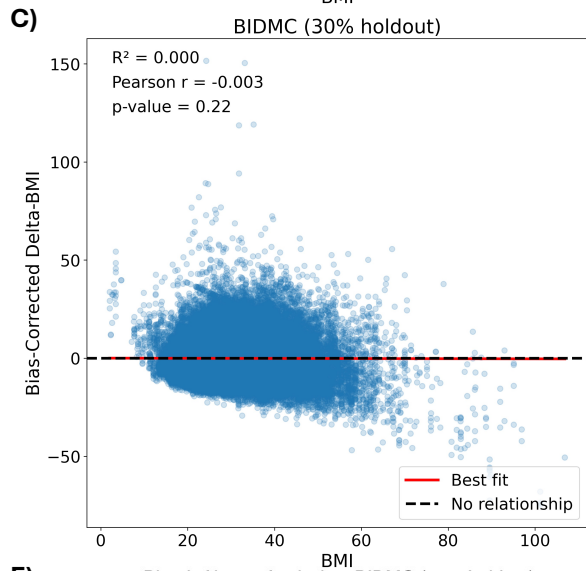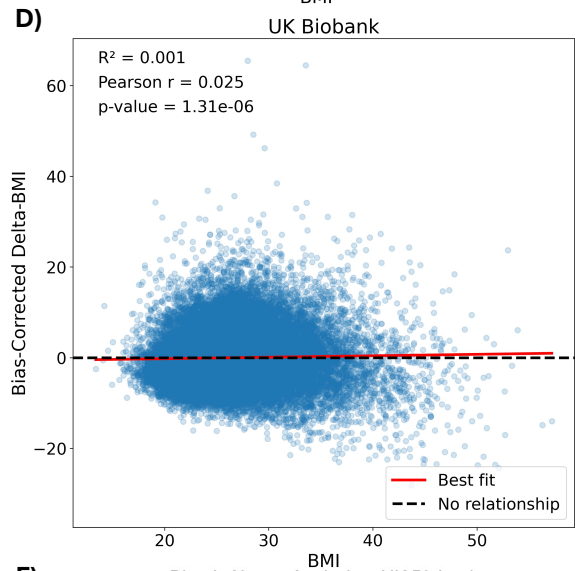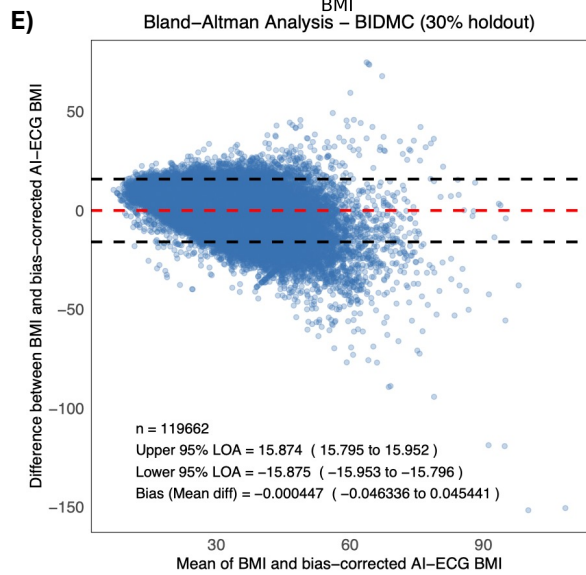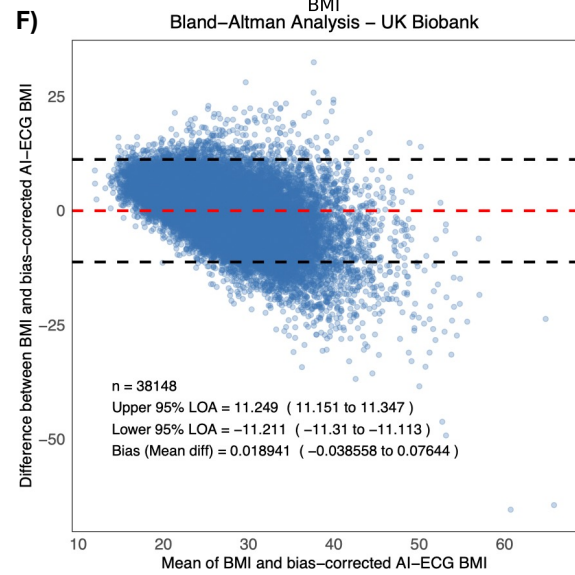

#### **Supplementary Table 4: Survival analysis – continuous outcomes**

Hazard Ratios from survival analysis of continuous AI-ECG delta BMI adjusted for measured BMI, age, and sex, on the future incidence of Cardiometabolic Disease, type 2 diabetes mellitus, hypertension, and lipid disorders in the BIDMC holdout set and the UK Biobank cohort. Sub-analyses include Cardiometabolic Disease stratified by BMI categories (18.5 – 24.9,  $\geq 25$ ,  $\geq 30$ ), as well as by sex for both the BIDMC holdout set and the UK Biobank cohort.



| <b>BIDMC (holdout)</b>                           |                  |               |                |          |            |            |            |
|--------------------------------------------------|------------------|---------------|----------------|----------|------------|------------|------------|
| <b>Disease</b>                                   | <b>Delta BMI</b> | <b>95% CI</b> | <b>p-value</b> | <b>z</b> | <b>Age</b> | <b>Sex</b> | <b>BMI</b> |
| <b>Cardiometabolic disease</b>                   | 1.01             | 1.00 – 1.01   | <0.001         | 4.7      | 1.02       | 0.83       | 1.02       |
| <b>Type 2 Diabetes Mellitus</b>                  | 1.01             | 1.01 – 1.02   | <0.001         | 11.1     | 1.01       | 0.71       | 1.06       |
| <b>Hypertension</b>                              | 1.01             | 1.01 – 1.02   | <0.001         | 9.3      | 1.02       | 0.77       | 1.03       |
| <b>Lipid Disorders</b>                           | 1.01             | 1.01 – 1.01   | <0.001         | 9.5      | 1.02       | 0.78       | 1.03       |
| <b>BIDMC (holdout) – Cardiometabolic disease</b> |                  |               |                |          |            |            |            |
| <b>Outpatient, BMI 18.5 – 24.9</b>               | 1.02             | 1.01 – 1.03   | <0.001         | 4.1      | 1.03       | 0.82       | 1.04       |
| <b>Outpatient, BMI &gt; 25</b>                   | 1.01             | 1.01 – 1.02   | <0.001         | 4.0      | 1.01       | 0.97       | 1.00       |
| <b>Outpatient, BMI &gt; 30</b>                   | 1.01             | 1.00 – 1.02   | 0.002          | 3.1      | 1.00       | 0.99       | 1.01       |
| <b>Outpatient, Females</b>                       | 1.02             | 1.01 – 1.02   | <0.001         | 5.2      | 1.02       | N/A        | 1.02       |
| <b>Outpatient, Males</b>                         | 1.01             | 1.00 – 1.02   | 0.003          | 2.9      | 1.01       | N/A        | 1.01       |
| <b>UK Biobank</b>                                |                  |               |                |          |            |            |            |
| <b>Cardiometabolic disease</b>                   | 1.02             | 1.02 – 1.03   | <0.005         | 7.2      | 1.06       | 0.71       | 1.09       |
| <b>Type 2 Diabetes Mellitus</b>                  | 1.05             | 1.04 – 1.07   | <0.005         | 8.3      | 1.04       | 0.50       | 1.15       |
| <b>Hypertension</b>                              | 1.02             | 1.02 – 1.03   | <0.005         | 6.0      | 1.06       | 0.71       | 1.10       |
| <b>Lipid Disorders</b>                           | 1.02             | 1.01 – 1.03   | <0.005         | 3.9      | 1.06       | 0.60       | 1.06       |
| <b>UK Biobank – Cardiometabolic Disease</b>      |                  |               |                |          |            |            |            |
| <b>BMI 18.5 – 24.9</b>                           | 1.03             | 1.01 – 1.04   | <0.005         | 3.8      | 1.08       | 0.80       | 1.12       |
| <b>BMI &gt; 25</b>                               | 1.02             | 1.02 – 1.03   | <0.005         | 5.8      | 1.05       | 0.68       | 1.08       |
| <b>BMI &gt; 30</b>                               | 1.03             | 1.02 – 1.04   | <0.005         | 4.6      | 1.05       | 0.68       | 1.07       |
| <b>Females</b>                                   | 1.03             | 1.02 – 1.04   | <0.005         | 6.0      | 1.07       | N/A        | 1.09       |
| <b>Males</b>                                     | 1.02             | 1.01 – 1.03   | <0.005         | 4.1      | 1.06       | N/A        | 1.09       |

### **Supplementary Table 5: Model improvement**

Analysis of model improvement with delta-BMI, evaluated through likelihood ratio tests (LRT), continuous net reclassification index (NRI), and differences in concordance index ( $\Delta$  C-index) across both the BIDMC and UK Biobank cohorts and their respective subgroups.

| <b>BIDMC (holdout)</b>                           |               |          |       |                |                  |                  |
|--------------------------------------------------|---------------|----------|-------|----------------|------------------|------------------|
| Type                                             | LRT: $\chi^2$ | p-value  | NRI   | 95% CI         | $\Delta$ C-index | 95% CI           |
| <b>Cardiometabolic disease</b>                   | 21.9          | < 0.0001 | 0.097 | 0.056 - 0.129  | 0.0055           | 0.0015 - 0.0091  |
| <b>Type 2 Diabetes Mellitus</b>                  | 118.1         | < 0.0001 | 0.172 | 0.125 - 0.213  | 0.0022           | 0.0008 - 0.0035  |
| <b>Hypertension</b>                              | 83.1          | < 0.0001 | 0.125 | 0.093 - 0.155  | 0.0035           | 0.0018 - 0.0052  |
| <b>Lipid Disorders</b>                           | 84.8          | < 0.0001 | 0.132 | 0.104 - 0.162  | 0.0018           | 0.0004 - 0.0030  |
| <b>UK Biobank</b>                                |               |          |       |                |                  |                  |
| <b>Cardiometabolic disease</b>                   | 36.6          | < 0.0001 | 0.161 | 0.117 - 0.200  | 0.0038           | 0.0014 - 0.0059  |
| <b>Type 2 Diabetes Mellitus</b>                  | 44.9          | < 0.0001 | 0.323 | 0.230 - 0.433  | 0.0121           | 0.0049 - 0.0195  |
| <b>Hypertension</b>                              | 26.2          | < 0.0001 | 0.145 | 0.102 - 0.192  | 0.0029           | 0.0007 - 0.0049  |
| <b>Lipid Disorders</b>                           | 12.6          | 0.00039  | 0.102 | 0.041 - 0.166  | 0.0025           | -0.0002 - 0.0048 |
| <b>BIDMC (holdout) – Cardiometabolic Disease</b> |               |          |       |                |                  |                  |
| <b>Outpatient, BMI 18.5 – 24.9</b>               | 16.0          | < 0.0001 | 0.109 | 0.016 - 0.189  | 0.0027           | -0.0016 - 0.0064 |
| <b>Outpatient, BMI &gt; 25</b>                   | 14.9          | 0.00012  | 0.090 | 0.029 - 0.161  | 0.0098           | 0.0020 - 0.0177  |
| <b>Outpatient, BMI &gt; 30</b>                   | 8.9           | 0.0029   | 0.108 | 0.009 - 0.224  | 0.0362           | 0.0218 - 0.0755  |
| <b>Outpatient, Females</b>                       | 23.8          | < 0.0001 | 0.133 | 0.060 - 0.198  | 0.0051           | 0.0008 - 0.0091  |
| <b>Outpatient, Males</b>                         | 8.3           | 0.0039   | 0.100 | 0.008 - 0.169  | 0.0074           | -0.0022 - 0.0163 |
| <b>Outpatient, Caucasian</b>                     | 21.5          | < 0.0001 | 0.114 | 0.045 - 0.168  | 0.0086           | 0.0031 - 0.0146  |
| <b>Outpatients, African American</b>             | 0.4           | 0.53     | 0.057 | -0.115 - 0.219 | -0.0004          | -0.0060 - 0.0038 |
| <b>Outpatients, Asian</b>                        | 0.03          | 0.86     | 0.070 | -0.156 - 0.363 | 0.0157           | -0.0029 - 0.0424 |
| <b>Outpatients, Hispanic</b>                     | 11.8          | 0.00059  | 0.287 | 0.091 - 0.505  | 0.0173           | -0.0069 - 0.0417 |
| <b>BIDMC (holdout) – T2DM</b>                    |               |          |       |                |                  |                  |
| <b>Outpatient, BMI 18.5 – 24.9</b>               | 42.0          | < 0.0001 | 0.366 | 0.261 - 0.452  | 0.0239           | 0.0053 - 0.0377  |
| <b>Outpatient, BMI &gt; 25</b>                   | 36.7          | < 0.0001 | 0.092 | 0.048 - 0.133  | 0.0029           | 0.0004 - 0.0053  |
| <b>Outpatient, BMI &gt; 30</b>                   | 3.8           | 0.0523   | 0.028 | -0.024 - 0.082 | 0.0001           | -0.0018 - 0.0015 |
| <b>Outpatient, Females</b>                       | 80.9          | < 0.0001 | 0.222 | 0.163 - 0.277  | 0.0108           | 0.0056 - 0.0162  |
| <b>Outpatient, Males</b>                         | 7.4           | 0.0064   | 0.079 | 0.025 - 0.128  | -0.0002          | -0.0012 - 0.0007 |
| <b>Outpatient, Caucasian</b>                     | 37.5          | < 0.0001 | 0.158 | 0.108 - 0.203  | 0.0024           | 0.0003 - 0.0044  |
| <b>Outpatients, African American</b>             | 3.9           | 0.048    | 0.038 | -0.047 - 0.146 | 0.0004           | -0.0031 - 0.0033 |
| <b>Outpatients, Asian</b>                        | 4.8           | 0.029    | 0.265 | 0.052 - 0.462  | 0.0117           | -0.0077 - 0.0304 |
| <b>Outpatients, Hispanic</b>                     | 19.4          | < 0.0001 | 0.099 | -0.022 - 0.266 | 0.0097           | 0.0008 - 0.0186  |
| <b>UK Biobank – Cardiometabolic Disease</b>      |               |          |       |                |                  |                  |
| <b>BMI 18.5 – 24.9</b>                           | 10.0          | 0.0016   | 0.094 | 0.014 - 0.179  | 0.0041           | -0.0006 - 0.0084 |
| <b>BMI &gt; 25</b>                               | 24.0          | < 0.0001 | 0.094 | 0.016 - 0.180  | 0.0044           | 0.0012 - 0.0076  |
| <b>BMI &gt; 30</b>                               | 14.1          | 0.00018  | 0.125 | 0.039 - 0.236  | 0.0071           | -0.0009 - 0.0043 |
| <b>Females</b>                                   | 27.4          | < 0.0001 | 0.180 | 0.125 - 0.259  | 0.0063           | 0.0017 - 0.0105  |
| <b>Males</b>                                     | 11.1          | 0.00085  | 0.121 | 0.051 - 0.179  | 0.0015           | -0.0009 - 0.0037 |
| <b>UK Biobank – T2DM</b>                         |               |          |       |                |                  |                  |
| <b>BMI 18.5 – 24.9</b>                           | 14.9          | 0.00012  | 0.220 | 0.021 - 0.464  | 0.0377           | 0.0036 - 0.0751  |
| <b>BMI &gt; 25</b>                               | 37.0          | < 0.0001 | 0.285 | 0.168 - 0.379  | 0.0186           | 0.0080 - 0.0300  |
| <b>BMI &gt; 30</b>                               | 20.3          | < 0.0001 | 0.251 | 0.104 - 0.413  | 0.0299           | 0.0055 - 0.0546  |
| <b>Females</b>                                   | 28.2          | < 0.0001 | 0.436 | 0.262 - 0.590  | 0.0153           | 0.0011 - 0.0297  |
| <b>Males</b>                                     | 19.1          | < 0.0001 | 0.246 | 0.126 - 0.366  | 0.0122           | 0.0017 - 0.0227  |

## Supplementary Figure 2 – Metabolome: calibration plot of stability selection with LASSO

Stability Selection (LASSO) applied on the UKB-NMRmet-ECG dataset with delta-BMI as the outcome. The calibration plot shows the stability scores for each iteration, with the highest stability score at  $\pi = 0.650$  and  $\lambda = 0.142$ , thus obtaining 14 stably selected predictors.

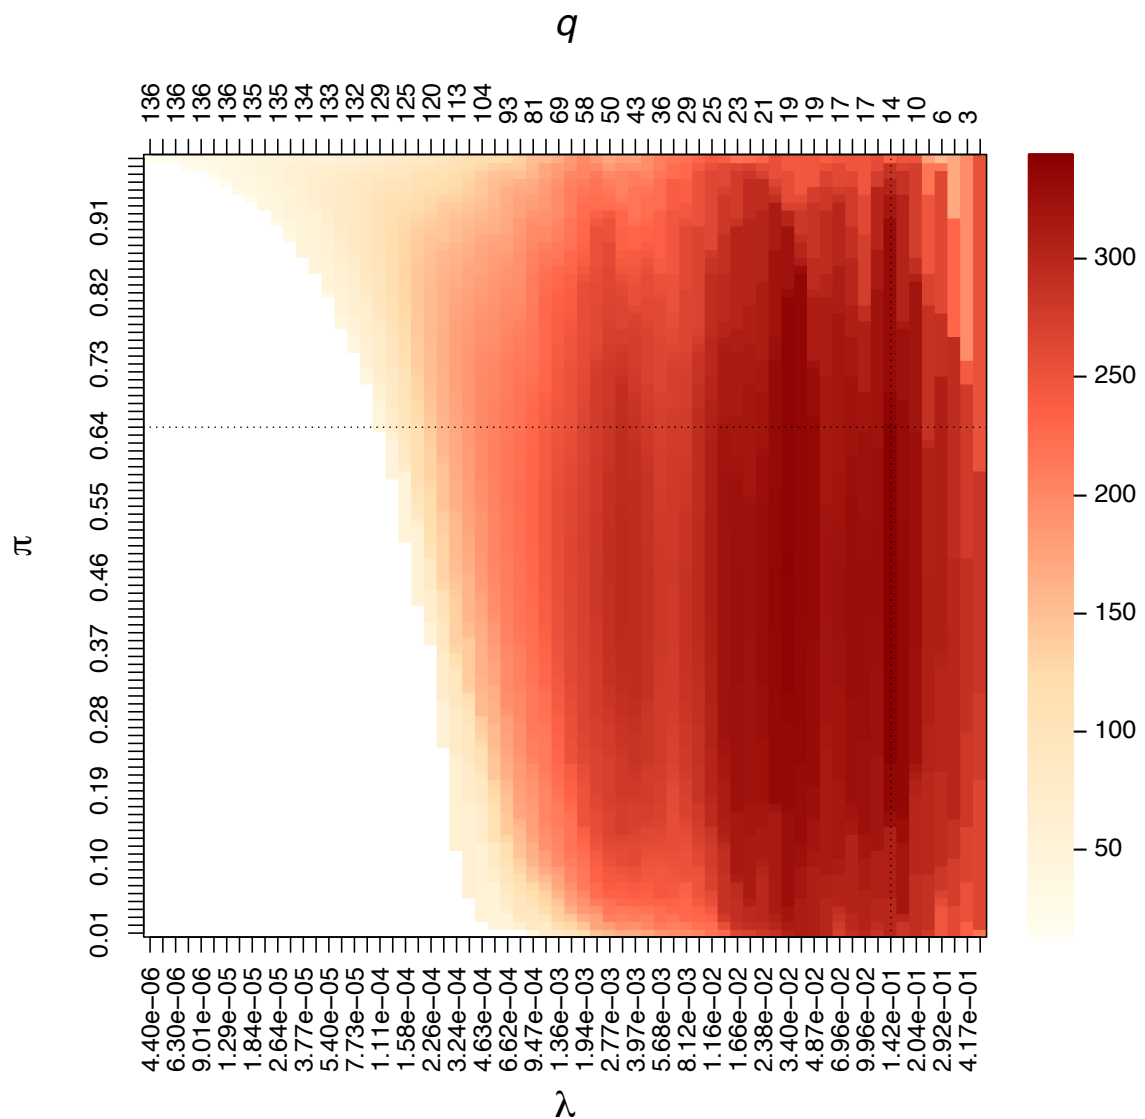

### Supplementary Figure 3: Pre-processing steps for the UK Biobank Proteomic and ECG dataset (UKB-PPP-ECG)

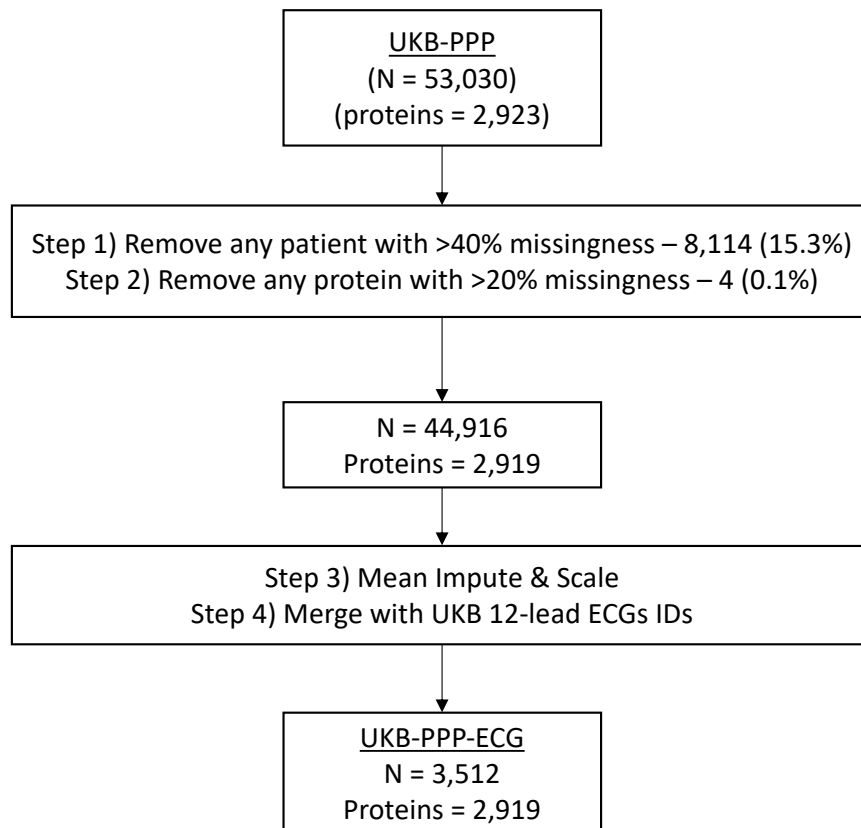

## Supplementary Figure 4: Proteome: calibration plot of stability selection with LASSO

Stability Selection (LASSO) applied on the UKB-PPP-ECG dataset with delta-BMI as the outcome. The calibration plot shows the stability scores for each iteration, with the highest stability score at  $\pi = 0.560$  and  $\lambda = 0.107$ , thus obtaining 39 stably selected variables.

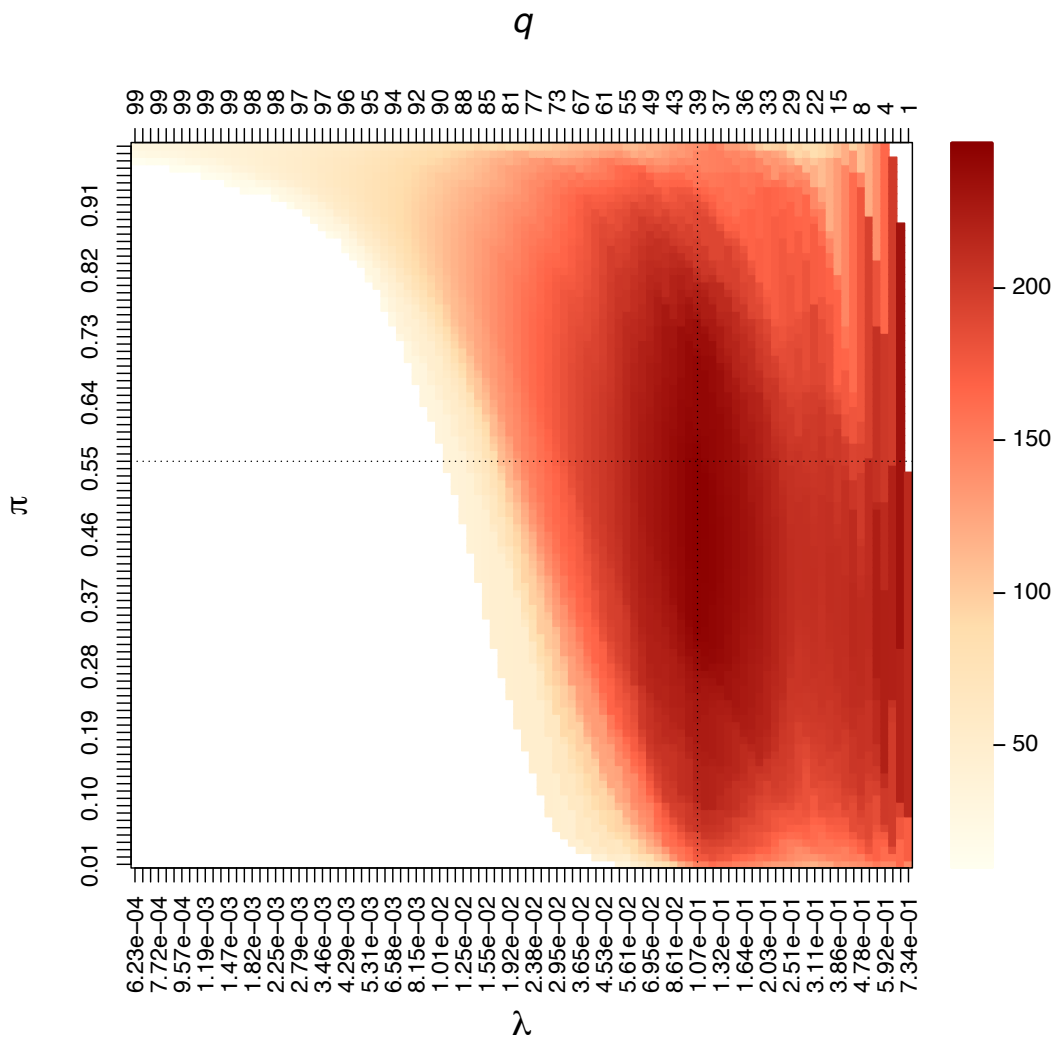

## Supplementary Figure 5: GWAS QQ plots

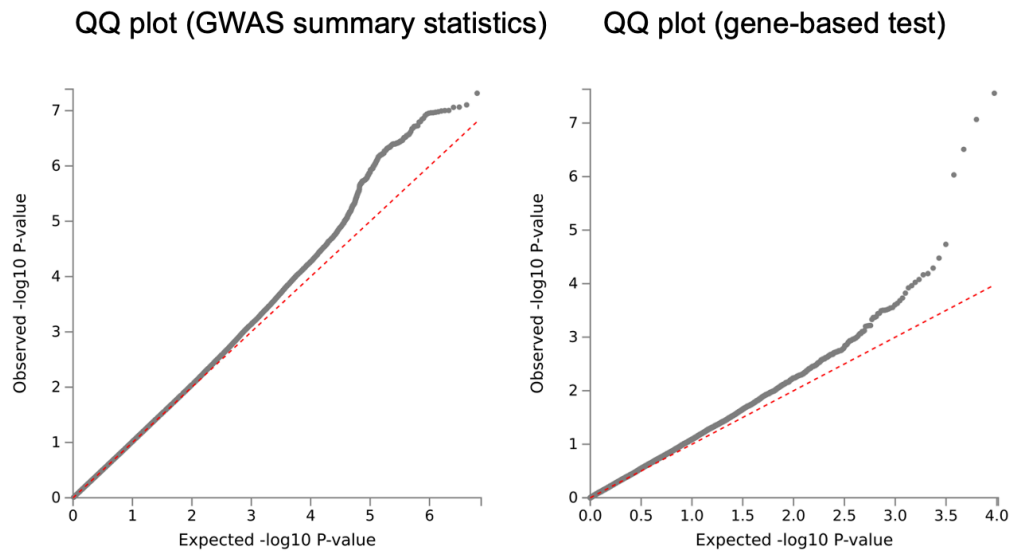

- i. GC lambda 0.5: 1.021  
GC lambda 0.1: 1.023  
GC lambda 0.01: 1.027  
GC lambda 0.001: 1.055

## Supplementary Figure 6: The VAE Convolutional Architecture

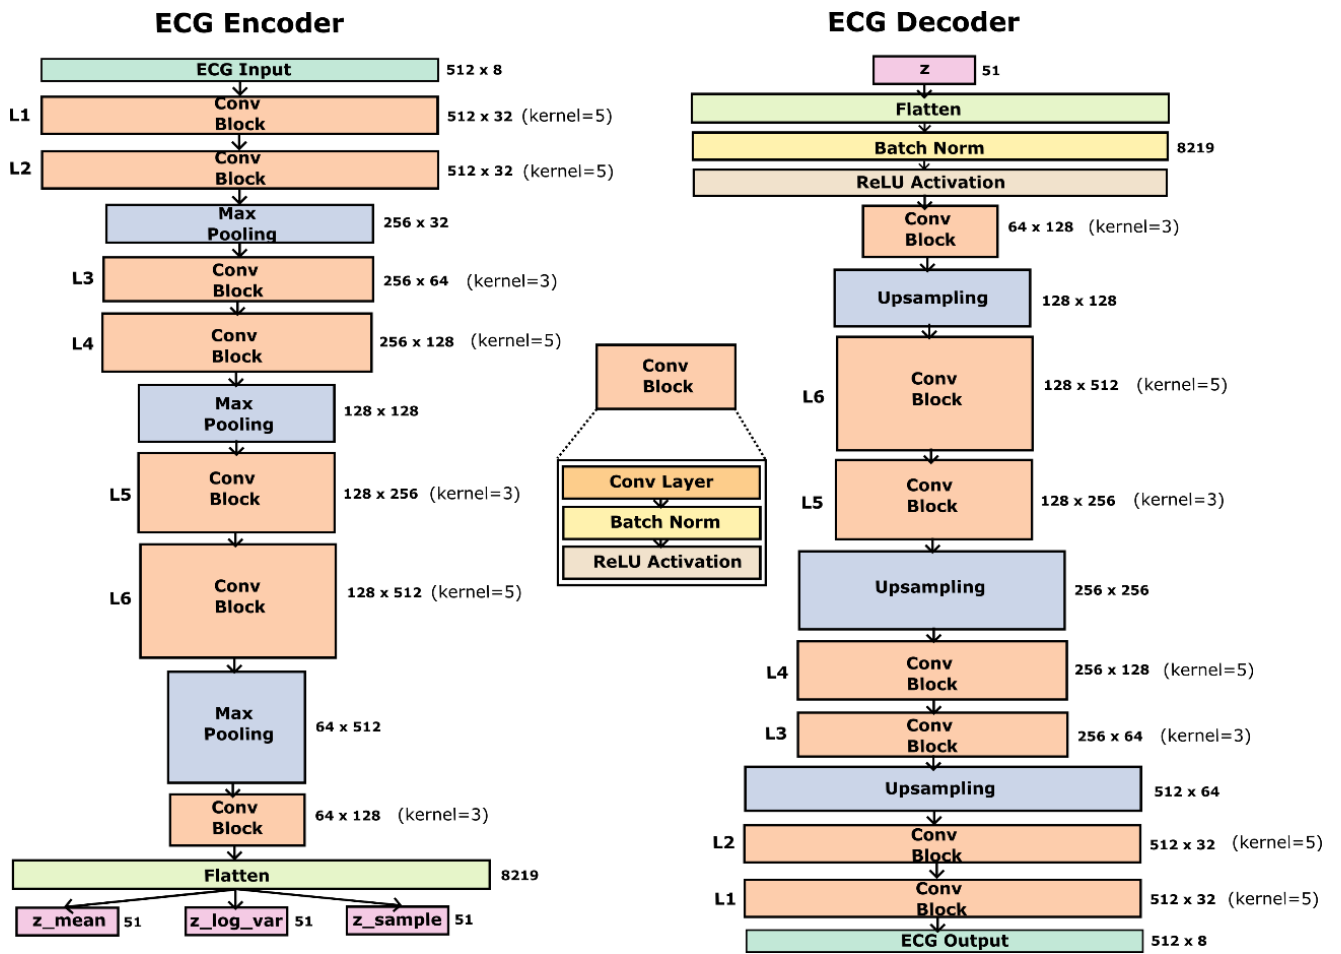



### **Supplementary Figure 7: AI-ECG BMI model explainability**

A variational auto-encoder-derived latent factors were used in an explainable XGBoost model to predict AI-ECG BMI predictions in A) the BIDMC cohort, and B) the UK Biobank cohort.

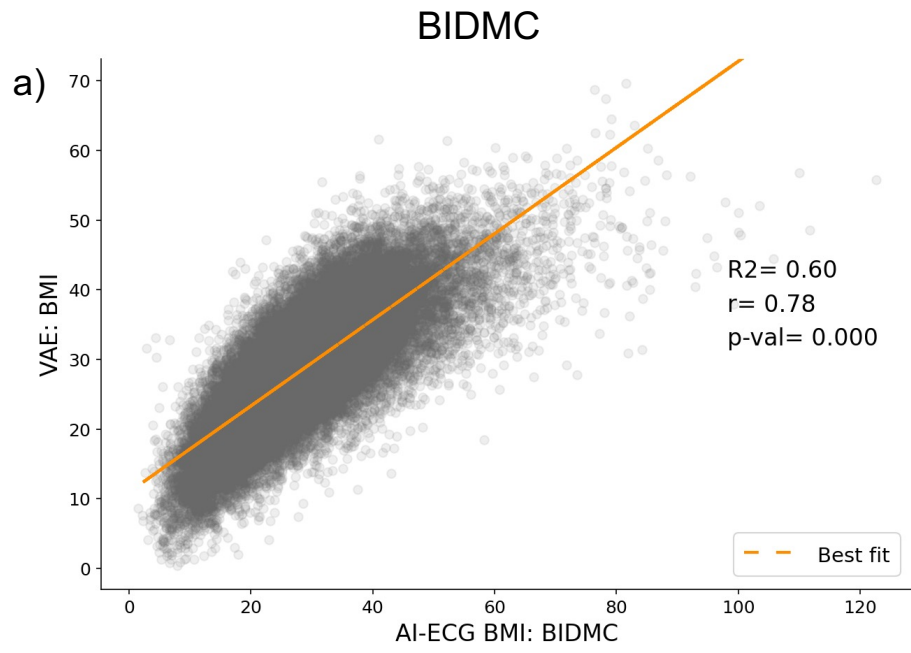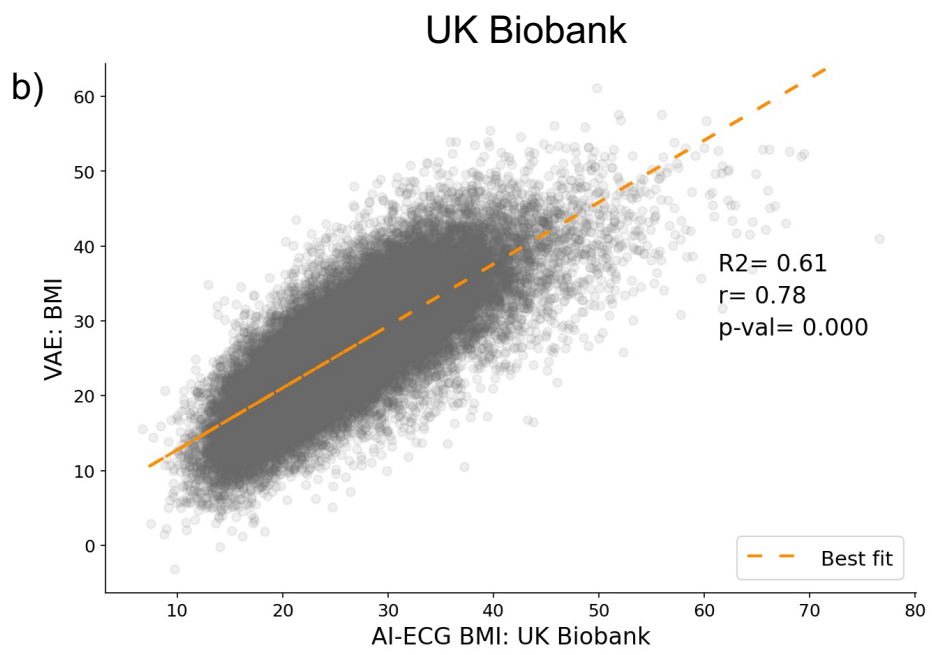

Supplement: 41746_2024_1170_MOESM1_ESM.pdf [file 41746_2024_1170_MOESM1_ESM.pdf]
